# Supplementary material
Source: Springer Nature journal article supplement (https://www.springermedizin.de/resource/supplementary/13256_2013_2762_MOESM1_ESM.pdf/9650456)
Supplement: MOESM1 [file 9650456]

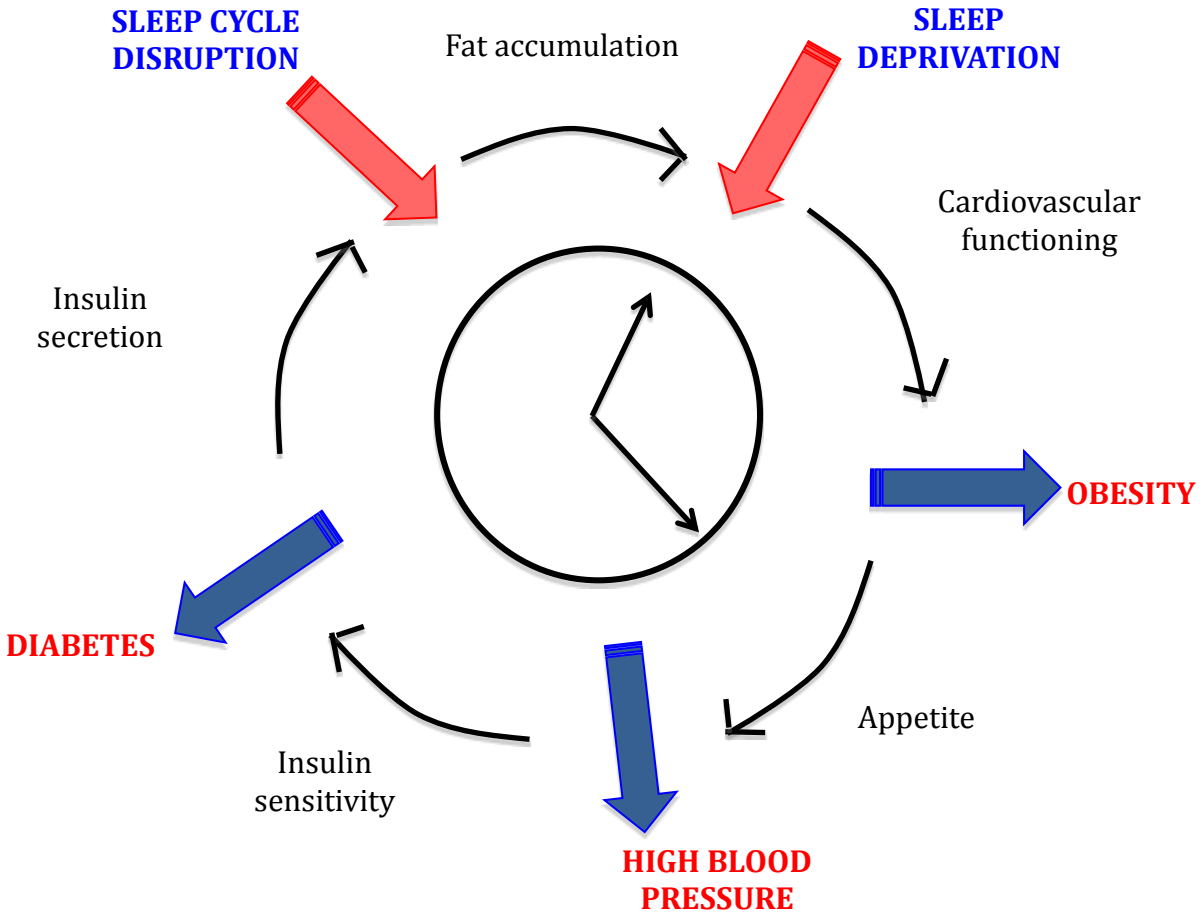

**SLEEP CYCLE  
DISRUPTION**

Fat accumulation

**SLEEP  
DEPRIVATION**

Cardiovascular  
functioning

Insulin  
secretion

**OBSESITY**

**DIABETES**

Insulin  
sensitivity

Appetite

**HIGH BLOOD  
PRESSURE**
